# Supplementary material for: Silica-coated magnetic iron oxide functionalized with hydrophobic polymeric ionic liquid: a promising nanoscale sorbent for simultaneous extraction of antidiabetic drugs from human plasma prior to their quantitation by HPLC
Source: Royal Society of Chemistry journal article supplement (doi:10.1039/c8ra02109k), 2018-01-01
Supplement: c8ra02109k1.pdf [file c8ra02109k1.pdf]

## Electronic Supplementary Material

**Silica-coated magnetic iron oxide functionalized with hydrophobic polymeric ionic liquid: promising nanoscale sorbent for simultaneous extraction of antidiabetic drugs from human plasma prior to their quantitation by HPLC**

**Sahar Badragheh<sup>1</sup>, Mohsen Zeeb<sup>2\*</sup>, Mohamad Reza Talei Babil Olyai<sup>2</sup>**

<sup>1</sup>Department of Chemistry, Karaj branch, Islamic Azad University, Karaj, Iran.

<sup>2</sup>Department of Applied Chemistry, Faculty of Science, Islamic Azad University, South Tehran Branch, Tehran, Iran

\*Correspondence E-mail: [zeeb.mohsen@gmail.com](mailto:zeeb.mohsen@gmail.com); [m\\_zeeb@azad.ac.ir](mailto:m_zeeb@azad.ac.ir)

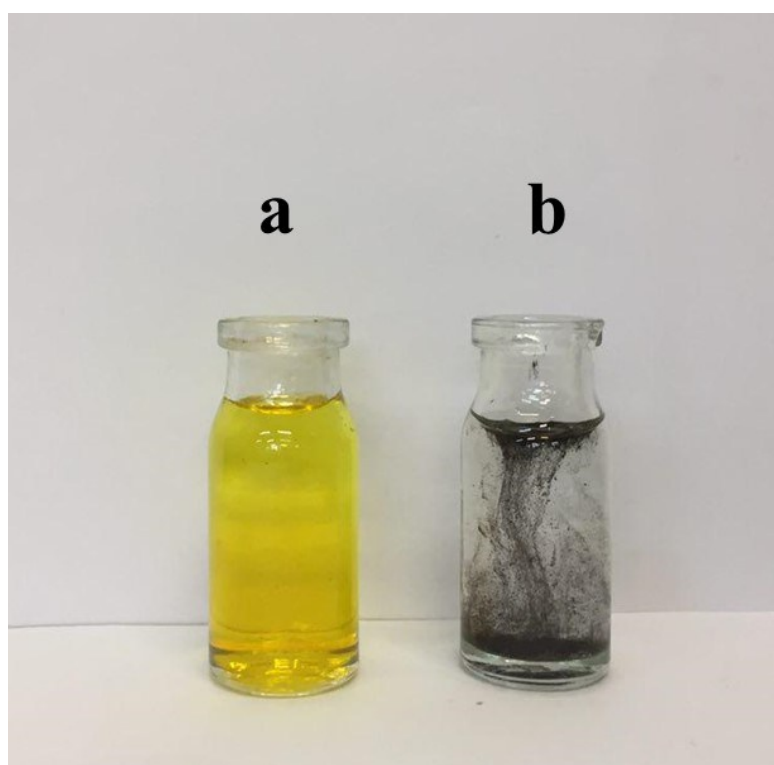

**Fig. S1.** Comparative acid corrosion experiments for  $\text{Fe}_3\text{O}_4$  (a) and  $\text{Fe}_3\text{O}_4@\text{SiO}_2$  (b) MNPs.

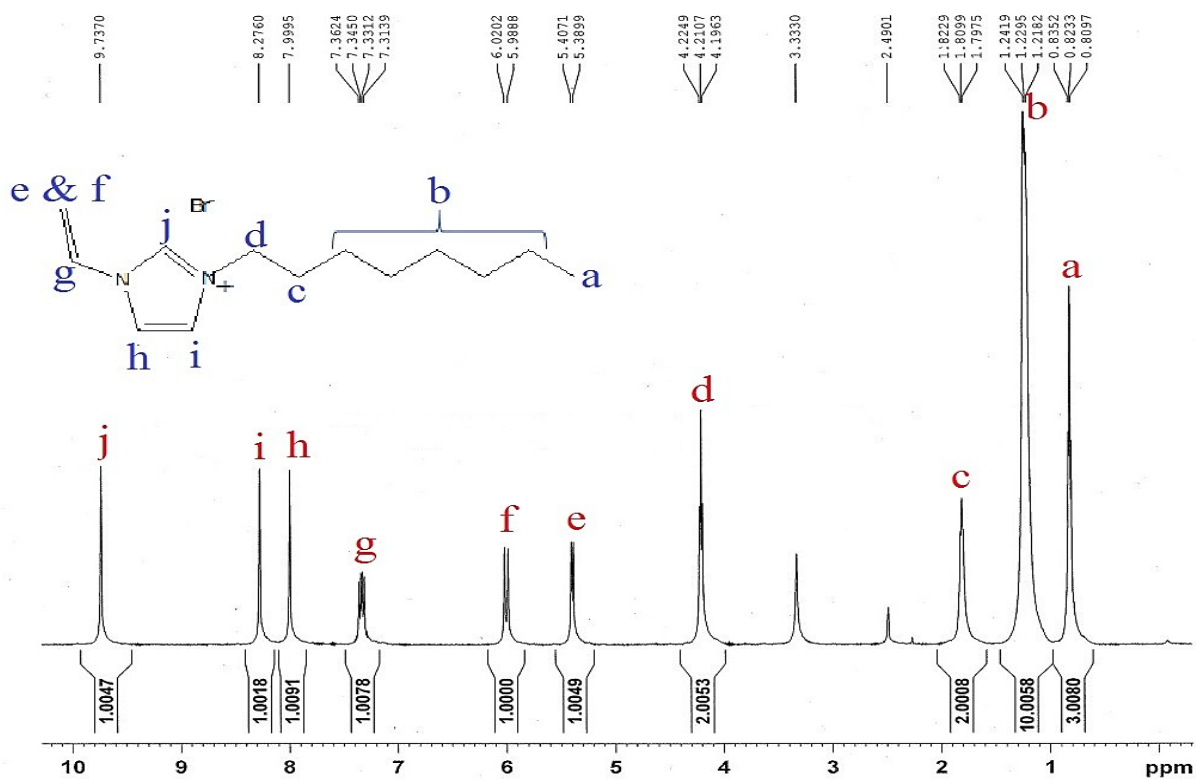

Fig. S2.  $^1\text{H}$  NMR spectrum of 1-vinyl-3-octylimidazolium bromide monomer.

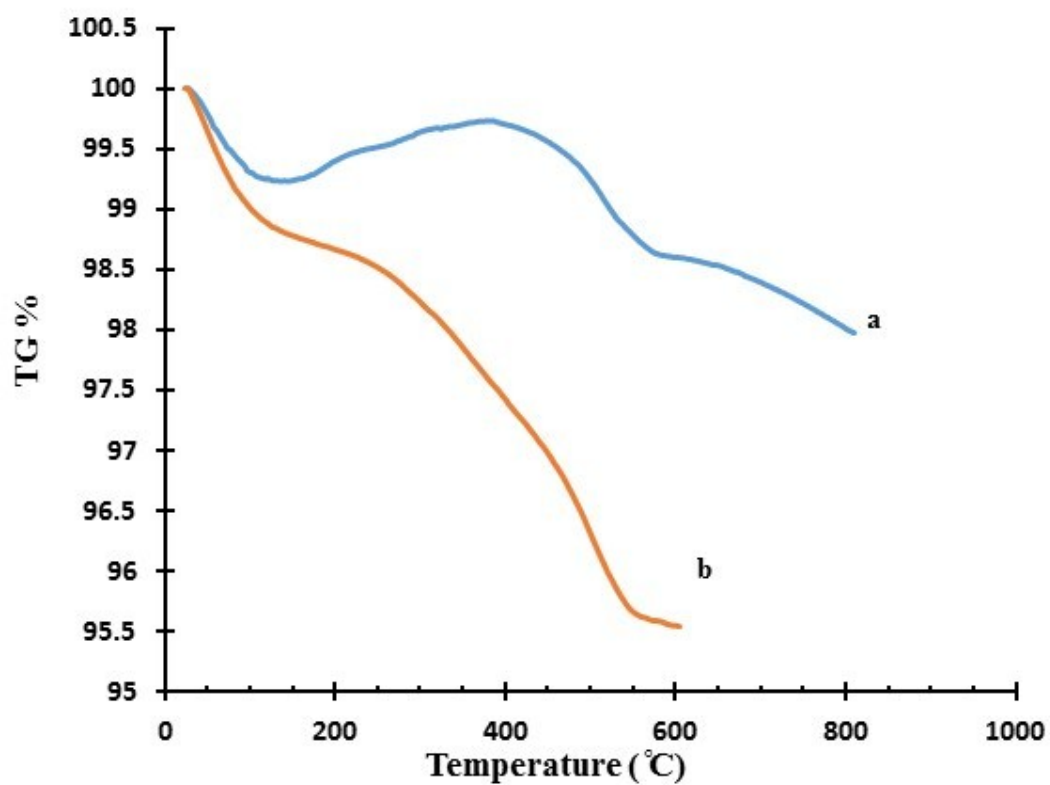

Fig. S3. TGA curves of  $\text{Fe}_3\text{O}_4@\text{SiO}_2@\text{VTES}$  (a) and  $\text{Fe}_3\text{O}_4@\text{SiO}_2@\text{PIL-PF}_6$  (b)

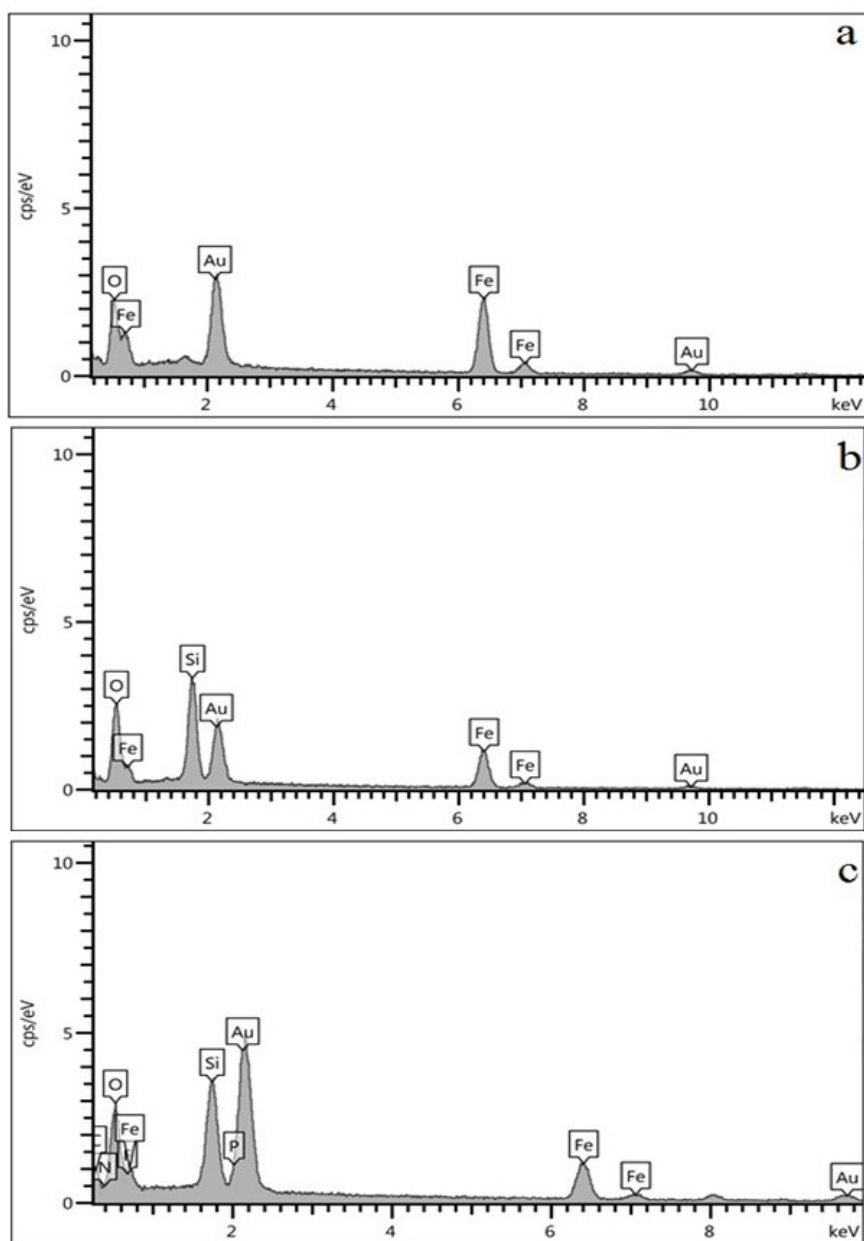

**Fig. S4.** EDXRF elemental compositions of  $\text{Fe}_3\text{O}_4$  (a),  $\text{Fe}_3\text{O}_4@\text{SiO}_2$  (b) and  $\text{Fe}_3\text{O}_4@\text{SiO}_2@\text{PIL-PF}_6$  (c).

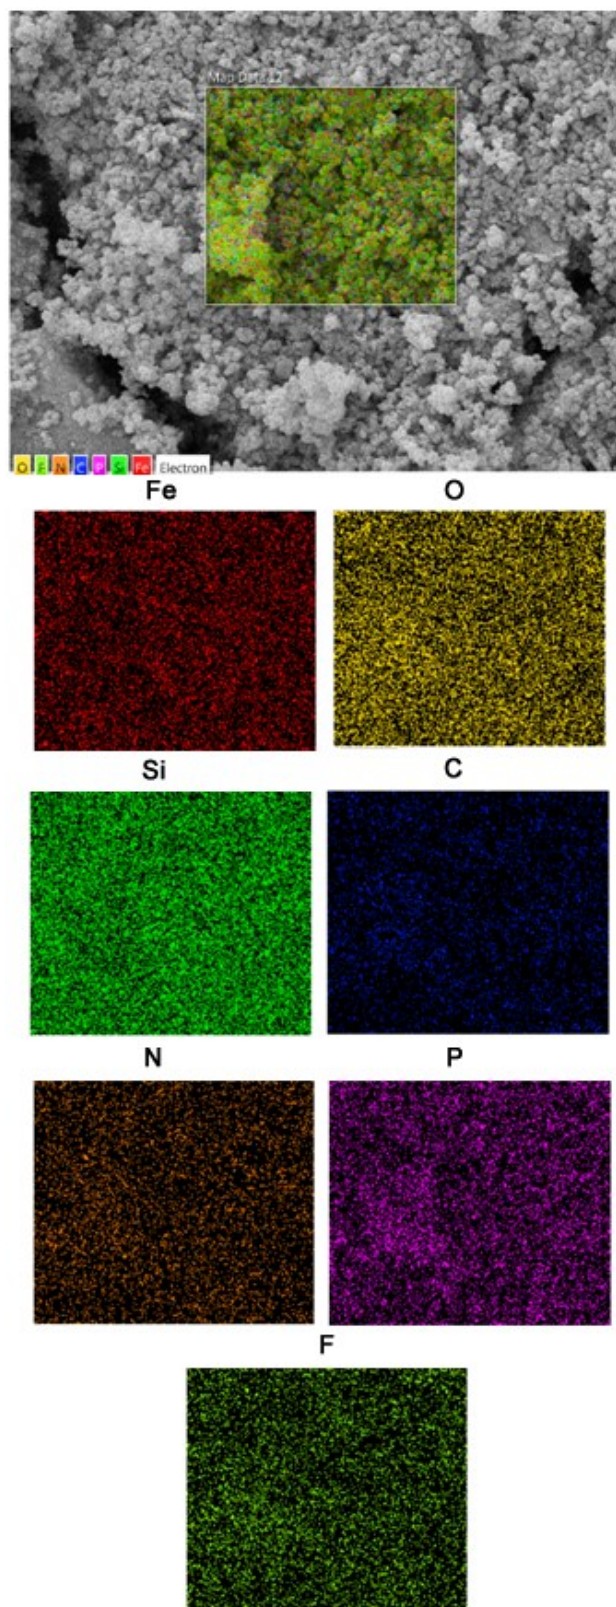

**Fig. S5.** EDXRF elemental mapping analysis. The top picture shows an overlay of all the elements present in the sample followed by several maps showing the position of each individual element (color figures online).
